# Supplementary material for: Parallel evolution of genome structure and transcriptional landscape in the Epsilonproteobacteria
Source: PubMed Central journal article supplement (PMC3847290; doi:10.1186/1471-2164-14-616), 2013-09-12
Supplement: 1471-2164-14-616-S4.pdf [file 1471-2164-14-616-S4.pdf]

**Table S2. *C. jejuni* genes with primary and secondary promoters.**

| Gene    | Promoter sequences from upstream -26 to ATG. Sigma factor recognition sequences are indicated <sup>a</sup>                                                |
|---------|-----------------------------------------------------------------------------------------------------------------------------------------------------------|
| Cj0054c | acctattaaactta <b>TATAAT</b> aaaga <u>A</u> cttat<N10>tag <b>CTAGAAT</b> ggaat <u>T</u> tattttaactaAAGGttgaaaaATG<br>$\sigma_{70}$ $\sigma_{70}$          |
| Cj0102  | tttagaaaatatt <b>gaTAAAAT</b> taaaa <u>A</u> att<N40>ttttat <b>ggTAAAAT</b> agtcct <u>T</u> ca<N10>ccaAGGAgaattATG<br>$\sigma_{70}$ $\sigma_{70}$         |
| Cj0205  | <b>GGCA</b> cgctttt <b>TGCTT</b> cagggcttat <u>A</u> gtg<N212>ttct <b>gaTATAAT</b> ttttc <u>T</u> tttgc<N10>caAGGAttaaaATG<br>$\sigma_{54}$ $\sigma_{70}$ |
| Cj0342c | tatccaagttcttt <b>TAAATAT</b> tattat <u>G</u> c <b>TAAAAT</b> cttaaa <u>T</u> ttatttaatgttTAGGAaagactATG<br>$\sigma_{70}$ $\sigma_{70}$                   |
| Cj0476  | aagaacaattat <b>ggGATAAT</b> gtagc <u>A</u> ctttt<N150>gttt <b>TAAAAT</b> aaacat <u>T</u> ga<N95>aaAGGAgaaaaATG<br>$\sigma_{70}$ $\sigma_{70}$            |
| Cj0547  | <b>GGCA</b> cagtttt <b>TGCTT</b> attatTTTT <u>T</u> tatta<N45>ttgt <b>CGATAT</b> aagctttt <u>A</u> ac<N20>aAGGAttttaaaATG<br>$\sigma_{54}$ $\sigma_{28}$  |
| Cj0897c | tattggttggttt <b>gaTACAAT</b> tatat <u>T</u> ttta<N35>aa <b>TAGAAT</b> tagaac <u>T</u> tga<N10>ttAAGGtaagaaaaATG<br>$\sigma_{70}$ $\sigma_{70}$           |
| Cj1001  | ataaacataataac <b>CGATTT</b> tatatag <u>A</u> aagtt<N10>tag <b>aTAAAAT</b> ccaaa <u>G</u> ctt<N10>caAGGAtaatcaATG<br>$\sigma_{28}$ $\sigma_{70}$          |
| Cj1103  | aaagcttaaatgt <b>gtTAAAAT</b> acatt <u>A</u> accta<N135>aatacag <b>TAAAAT</b> atcttct <u>A</u> aatAAGGttgaaaaATG<br>$\sigma_{70}$ $\sigma_{70}$           |
| Cj1156  | ttaaaaaaatattttt <b>TATAAT</b> tata <u>A</u> aca<N25>at <b>TAAAAT</b> caca <u>T</u> ttttac<N20>ttacGAGGacttATG<br>$\sigma_{70}$ $\sigma_{70}$             |
| Cj1316c | atatataaaatca <b>TAAAAT</b> aaaattt <u>A</u> attataa <b>CGATAT</b> tatatattt <u>A</u> agactaattaaAGGAaatttATG<br>$\sigma_{70}$ $\sigma_{28}$              |
| Cj1361c | aataagattttag <b>gcTAAAAT</b> tt <b>gcTAGAAT</b> ttacatt <u>A</u> aactttaatgattATGGtttaaaaATG<br>$\sigma_{70}$ $\sigma_{70}$                              |

a) Promoter sequences indicated are:  $\sigma^{28}$ , CGATwT at -10 position;  $\sigma^{54}$ , GGcA-N7-TGCTT at -24/-12 positions;  $\sigma^{70}$ , gnTAnaAT at -10 position. All relevant sequences are shown in capital letters; bold typeface indicates promoter sequences, bold and underlined typeface indicate TSS, capital letters alone indicate ribosome binding sites and startcodons. <Nxx> indicates length of sequences not shown.
