# Supplementary material for: Parallel evolution of genome structure and transcriptional landscape in the Epsilonproteobacteria
Source: PubMed Central journal article supplement (PMC3847290; doi:10.1186/1471-2164-14-616), 2013-09-12
Supplement: 1471-2164-14-616-S5.pdf [file 1471-2164-14-616-S5.pdf]

**Table S3. Comparison of *C. jejuni* TSS identified by dRNA-seq with TSS identified by 5' RACE and primer extension**

| <b>Cj gene</b> | <b>gene name and location TSS</b> | <b><i>C. jejuni</i> strain</b> | <b>Strand</b> | <b>Published TSS</b> | <b>dRNA-seq TSS</b> | <b>Difference <sup>a</sup></b> | <b>Method <sup>b</sup></b> | <b>Reference</b> |
|----------------|-----------------------------------|--------------------------------|---------------|----------------------|---------------------|--------------------------------|----------------------------|------------------|
| 0008           | hypothetical, antisense           | NCTC 11168                     | -             | 13687                | 13687               | 0                              | RACE                       | This study       |
| 0062c          | hypothetical                      | 81-176                         | -             | 76518                | 76614               | 96                             | PE                         | [1]              |
| 0069           | hypothetical                      | 129108                         | +             | 81996                | 81995               | -1                             | PE                         | [2]              |
| 0076c          | <i>lctP</i>                       | NCTC 11168                     | -             | 88746                | 88746               | 0                              | RACE                       | This study       |
| 0079c          | <i>cdtA</i>                       | 81116                          | -             | 91151                | 91099               | -52                            | PE                         | [3]              |
| 0169           | <i>sodB</i>                       | 129108                         | +             | 166345               | 166345              | 0                              | PE                         | [2]              |
| 0193c          | <i>tig</i>                        | 129108                         | -             | 189481               | 189481              | 0                              | PE                         | [2]              |
| 0200c          | hypothetical                      | 81116                          | -             | 196493               | 196494              | 1                              | PE                         | [4]              |
| 0322           | <i>perR</i>                       | NCTC 11168                     | +             | 293905               | 293907              | 2                              | PE                         | [5]              |
| 0333c          | <i>fdxA</i>                       | 81116                          | -             | 302204               | 302204              | 0                              | PE                         | [6]              |
| 0334           | <i>ahpC</i>                       | 81116                          | +             | 302352               | 302353              | 1                              | PE                         | [7]              |
| 0335           | <i>flhB</i>                       | 81116                          | +             | 303008               | 303066              | 58                             | PE                         | [8]              |
| 0369c          | hypothetical                      | NCTC 11168                     | -             | 338941               | 338946              | 5                              | PE                         | [9]              |
| 0437_up        | <i>mfrX</i>                       | NCTC 11168                     | +             | 405091               | 405091              | 0                              | RACE                       | [10]             |
| 0465c          | <i>ctb</i>                        | NCTC 11168                     | -             | 430983               | 430983              | 0                              | PE                         | [11]             |
| 0509c          | <i>clpB</i>                       | clinical isolate               | -             | 477261               | 477260              | -1                             | PE                         | [12]             |
| 0531           | <i>icd</i>                        | 129108                         | +             | 494044               | 494044              | 0                              | PE                         | [2]              |
| 0606           | hypothetical                      | 81116                          | +             | 564447               | 564447              | 0                              | PE                         | [4]              |
| 0613           | <i>pstS</i>                       | 81116                          | +             | 573200               | 573199              | -1                             | PE                         | [13]             |
| 0671           | <i>dcuB</i> , antisense           | NCTC 11168                     | -             | 626800               | 626800              | 0                              | RACE                       | This study       |
| 0693c          | hypothetical                      | 129108                         | -             | 650905               | 650903              | -2                             | PE                         | [2]              |
| 0696           | <i>ftsZ</i> , internal            | NCTC 11168                     | -             | 653831               | 653831              | 0                              | RACE                       | This study       |
| 0757           | <i>hcrA</i>                       | clinical isolate               | +             | 707806               | 707802              | -4                             | PE                         | [14]             |
| 0762c          | <i>aspB</i>                       | 129108                         | -             | 713986               | 713988              | 2                              | PE                         | [2]              |
| 0830           | hypothetical                      | NCTC 11168                     | +             | 776863               | 776863              | 0                              | RACE                       | [11]             |
| 0883c          | hypothetical                      | 129108                         | -             | 820178               | 820179              | 1                              | PE                         | [2]              |
| 0884           | <i>rpsO</i>                       | 129108                         | +             | 820287               | 820287              | 0                              | PE                         | [2]              |
| 0886c          | <i>ftsK</i>                       | 129108                         | -             | 823523               | 823609              | 86                             | PE                         | [2]              |
| 0913c          | <i>hupB</i>                       | 129108                         | -             | 849758               | 849758              | 0                              | PE                         | [2]              |
| 0924c          | <i>cheB'</i>                      | 129108                         | -             | 860168               | 860162              | -6                             | PE                         | [2]              |
| 0989           | hypothetical                      | 129108                         | +             | 921165               | 921114              | -51                            | PE                         | [2]              |
| 1034c          | <i>fedC</i>                       | 81-176                         | -             | 969401               | 969400              | -1                             | PE                         | [1]              |

|       |                         |                  |   |         |         |     |      |            |
|-------|-------------------------|------------------|---|---------|---------|-----|------|------------|
| 1061c | <i>ileS</i>             | 129108           | - | 999554  | 999554  | 0   | PE   | [2]        |
| 1064  | <i>rdxA</i>             | 81-176           | + | 1001190 | 1001190 | 0   | PE   | [15]       |
| 1096c | <i>metK</i>             | 129108           | - | 1030835 | 1030836 | 1   | PE   | [2]        |
| 1103  | <i>csrA</i> , internal  | NCTC 11168       | - | 1037934 | 1037934 | 0   | RACE | This study |
| 1103  | <i>csrA</i> , internal  | NCTC 11168       | - | 1038095 | 1038095 | 0   | RACE | This study |
| 1132c | hypothetical            | HB93-13          | - | 1066758 | 1066758 | 0   | RACE | [16]       |
| 1133  | <i>waaC</i>             | HB93-13          | + | 1066773 | 1066773 | 0   | RACE | [16]       |
| 1146c | <i>waaV</i>             | HB93-13          | - | 1080876 | 1080878 | 2   | RACE | [16]       |
| 1148  | <i>waaF</i>             | HB93-13          | + | 1080877 | 1080878 | 1   | RACE | [16]       |
| 1156  | <i>rho</i>              | 129108           | + | 1088330 | 1088294 | -36 | PE   | [2]        |
| 1220  | <i>groES</i>            | clinical isolate | + | 1149145 | 1149145 | 0   | PE   | [17]       |
| 1223c | <i>dccR</i>             | 81116            | - | 1153040 | 1153039 | -1  | PE   | [4]        |
| 1288c | <i>glx2</i>             | 129108           | - | 1221396 | 1221408 | 12  | PE   | [2]        |
| 1293  | <i>pseB</i>             | 81-176           | + | 1224822 | 1224822 | 0   | PE   | [18]       |
| 1338c | <i>flaB</i>             | 81116            | - | 1269112 | 1269112 | 0   | PE   | [19]       |
| 1339c | <i>flaA</i>             | 81116            | - | 1270993 | 1270994 | 1   | PE   | [19]       |
| 1355  | <i>ceuE</i> , antisense | NCTC 11168       | - | 1286962 | 1286962 | 0   | RACE | This study |
| 1356c | hypothetical            | 81116            | - | 1288473 | 1288472 | -1  | PE   | [4]        |
| 1450  | <i>ciaI</i>             | 81-176           | + | 1388231 | 1388235 | 4   | PE   | [1]        |
| 1500  | <i>fdhT</i>             | NCTC 11168       | + | 1432561 | 1432561 | 0   | RACE | [20]       |
| 1503c | <i>putP</i>             | NCTC 11168       | - | 1439066 | 1439066 | 0   | RACE | [20]       |
| 1505c | hypothetical            | NCTC 11168       | - | 1440795 | 1440795 | 0   | RACE | [20]       |
| 1506c | <i>cca</i>              | NCTC 11168       | - | 1443012 | 1443012 | 0   | RACE | [20]       |
| 1508c | <i>fdhD</i>             | NCTC 11168       | - | 1444629 | 1444629 | 0   | RACE | [20]       |
| 1514c | <i>fdhM</i>             | NCTC 11168       | - | 1450118 | 1450118 | 0   | RACE | [20]       |
| 1558  | <i>arsP</i>             | CB5-28           | + | 1490186 | 1490183 | -3  | PE   | [21]       |
| 1586  | <i>cgb</i>              | NCTC 11168       | + | 1517544 | 1517544 | 0   | RACE | [11]       |
| 1615  | <i>chuB</i> , antisense | NCTC 11168       | - | 1543051 | 1543051 | 0   | RACE | This study |
| 1626c | hypothetical            | 81116            | - | 1555084 | 1555083 | -1  | PE   | [4]        |

a) Difference is expressed as [Published TSS - dRNA-seq TSS].

b) PE = primer extension analysis, RACE = 5' RACE (Rapid extension of cDNA ends).

## REFERENCES

1. Barrero-Tobon AM, Hendrixson DR: **Identification and analysis of flagellar coexpressed determinants (Feds) of *Campylobacter jejuni* involved in colonization.** *Mol Microbiol* 2012, **84**(2):352-369.
2. Wosten MM, Boeve M, Koot MG, van Nuenen AC, van der Zeijst BA: **Identification of *Campylobacter jejuni* promoter sequences.** *J Bacteriol* 1998, **180**(3):594-599.
3. Jeon B, Itoh K, Ryu S: **Promoter analysis of cytolethal distending toxin genes (cdtA , B, and C ) and effect of a luxS mutation on CDT production in *Campylobacter jejuni*.** *Microbiol Immunol* 2005, **49**(7):599-603.
4. Wosten MM, van Dijk L, Parker CT, Guilhabert MR, van der Meer-Janssen YP, Wagenaar JA, van Putten JP: **Growth phase-dependent activation of the DccRS regulon of *Campylobacter jejuni*.** *J Bacteriol* 2010, **192**(11):2729-2736.
5. Kim M, Hwang S, Ryu S, Jeon B: **Regulation of perR expression by iron and PerR in *Campylobacter jejuni*.** *J Bacteriol* 2011:Epub ahead of print, 13 September 2011.
6. van Vliet AHM, Baillon MA, Penn CW, Ketley JM: **The iron-induced ferredoxin FdxA of *Campylobacter jejuni* is involved in aerotolerance.** *FEMS Microbiol Lett* 2001, **196**(2):189-193.
7. Baillon ML, van Vliet AHM, Ketley JM, Constantinidou C, Penn CW: **An iron-regulated alkyl hydroperoxide reductase (AhpC) confers aerotolerance and oxidative stress resistance to the microaerophilic pathogen *Campylobacter jejuni*.** *J Bacteriol* 1999, **181**(16):4798-4804.
8. Matz C, van Vliet AHM, Ketley JM, Penn CW: **Mutational and transcriptional analysis of the *Campylobacter jejuni* flagellar biosynthesis gene flhB.** *Microbiology* 2002, **148**(Pt 6):1679-1685.
9. Guo B, Wang Y, Shi F, Barton YW, Plummer P, Reynolds DL, Nettleton D, Grinnage-Pulley T, Lin J, Zhang Q: **CmeR functions as a pleiotropic regulator and is required for optimal colonization of *Campylobacter jejuni* in vivo.** *J Bacteriol* 2008, **190**(6):1879-1890.
10. Guccione E, Hitchcock A, Hall SJ, Mulholland F, Shearer N, van Vliet AHM, Kelly DJ: **Reduction of fumarate, mesaconate and crotonate by Mfr, a novel oxygen-regulated periplasmic reductase in *Campylobacter jejuni*.** *Environ Microbiol* 2010, **12**(3):576-591.
11. Elvers KT, Turner SM, Wainwright LM, Marsden G, Hinds J, Cole JA, Poole RK, Penn CW, Park SF: **NssR, a member of the Crp-Fnr superfamily from *Campylobacter jejuni*, regulates a nitrosative stress-responsive regulon that includes both a single-domain and a truncated haemoglobin.** *Mol Microbiol* 2005, **57**(3):735-750.
12. Thies FL, Karch H, Hartung HP, Giegerich G: **The ClpB protein from *Campylobacter jejuni*: molecular characterization of the encoding gene and antigenicity of the recombinant protein.** *Gene* 1999, **230**(1):61-67.
13. Wosten MM, Parker CT, van Mourik A, Guilhabert MR, van Dijk L, van Putten JP: **The *Campylobacter jejuni* PhosS/PhosR operon represents a non-classical phosphate-sensitive two-component system.** *Mol Microbiol* 2006, **62**(1):278-291.
14. Thies FL, Karch H, Hartung HP, Giegerich G: **Cloning and expression of the dnaK gene of *Campylobacter jejuni* and antigenicity of heat shock protein 70.** *Infect Immun* 1999, **67**(3):1194-1200.
15. Ribardo DA, Bingham-Ramos LK, Hendrixson DR: **Functional Analysis of the RdxA and RdxB Nitroreductases of *Campylobacter jejuni* Reveals Mutations in rdxA Confer Metronidazole Resistance.** *J Bacteriol* 2010, **192**(7):1890-1901.

16. Phongsisay V, Fry BN: **Bidirectional transcription of lipooligosaccharide synthesis genes from *Campylobacter jejuni***. *Int J Med Microbiol* 2007, **297**(6):431-441.
17. Thies FL, Weishaupt A, Karch H, Hartung HP, Giegerich G: **Cloning, sequencing and molecular analysis of the *Campylobacter jejuni* groESL bicistronic operon**. *Microbiology* 1999, **145** ( Pt 1):89-98.
18. Goon S, Kelly JF, Logan SM, Ewing CP, Guerry P: **Pseudaminic acid, the major modification on *Campylobacter* flagellin, is synthesized via the Cj1293 gene**. *Mol Microbiol* 2003, **50**(2):659-671.
19. Nuijten PJ, van Asten FJ, Gaastra W, van der Zeijst BA: **Structural and functional analysis of two *Campylobacter jejuni* flagellin genes**. *J Biol Chem* 1990, **265**(29):17798-17804.
20. Shaw FL, Mulholland F, Le Gall G, Porcelli I, Hart DJ, Pearson BM, van Vliet AHM: **Selenium-dependent biogenesis of formate dehydrogenase in *Campylobacter jejuni* is controlled by the fdhTU accessory genes**. *J Bacteriol* 2012, **194**(15):3814-3823.
21. Wang L, Jeon B, Sahin O, Zhang Q: **Identification of an arsenic resistance and arsenic-sensing system in *Campylobacter jejuni***. *Appl Environ Microbiol* 2009, **75**(15):5064-5073.
