# Supplementary material for: Parallel evolution of genome structure and transcriptional landscape in the Epsilonproteobacteria
Source: PubMed Central journal article supplement (PMC3847290; doi:10.1186/1471-2164-14-616), 2013-09-12
Supplement: 1471-2164-14-616-S7.pdf [file 1471-2164-14-616-S7.pdf]

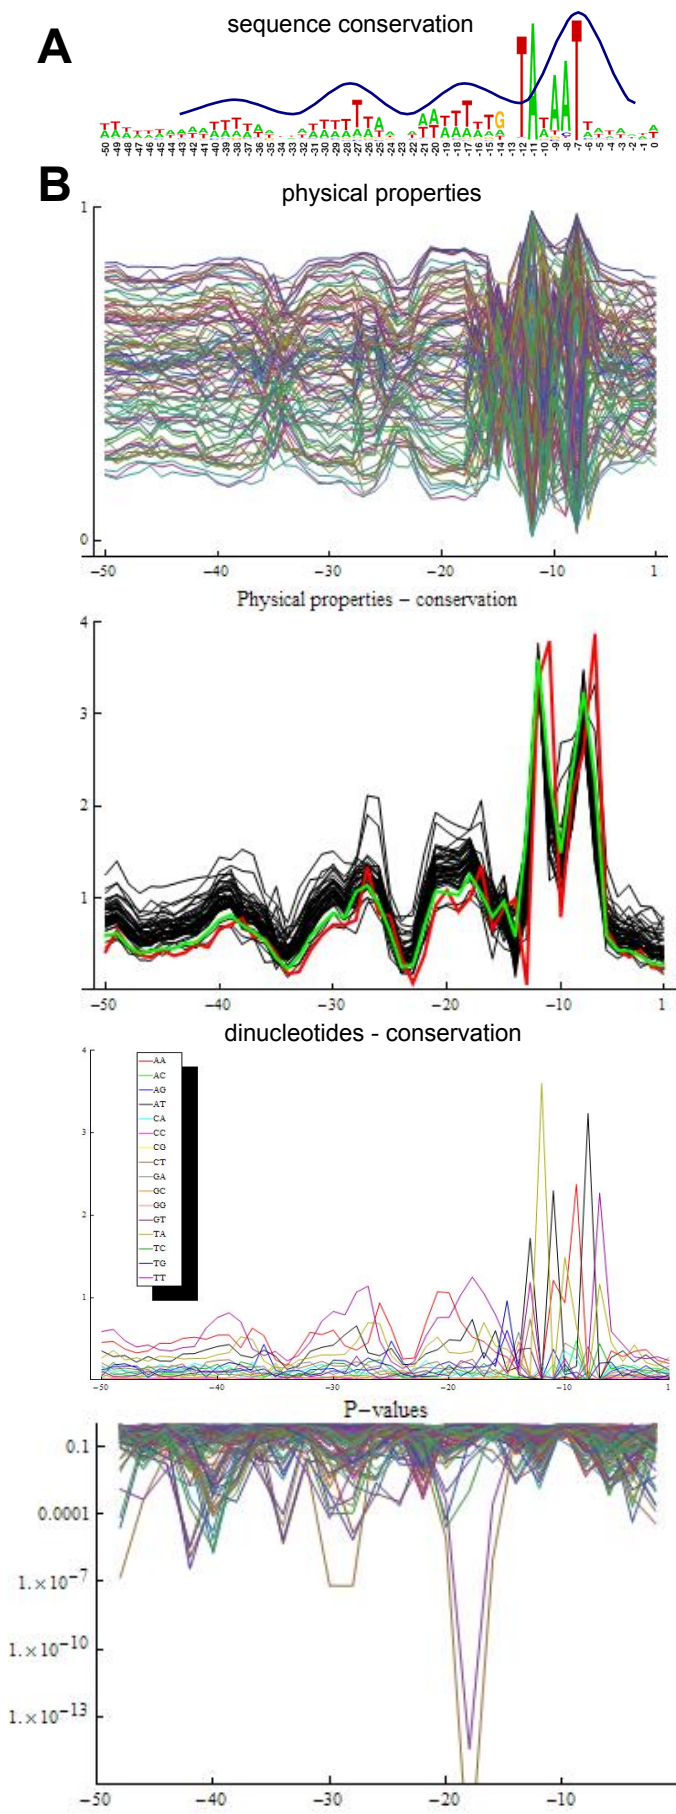

Porcelli et al , Figure S4
