# Supplementary material for: Parallel evolution of genome structure and transcriptional landscape in the Epsilonproteobacteria
Source: PubMed Central journal article supplement (PMC3847290; doi:10.1186/1471-2164-14-616), 2013-09-12
Supplement: 1471-2164-14-616-S12.pdf [file 1471-2164-14-616-S12.pdf]

gatTAAAATtaatttAga<N44>aagaAAGGtaaaagATG  
 -10 +1 RBS TrpL

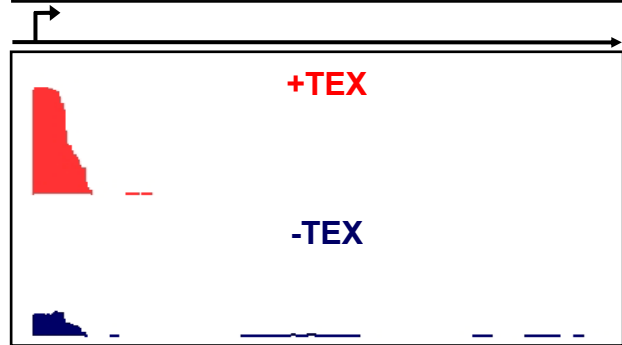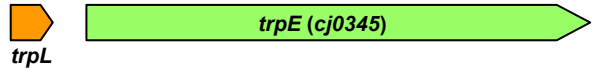

|            |                                             |
|------------|---------------------------------------------|
| Cjejuni    | : MSENGFFSNLILKLTHTLRS <u>W</u> R <u>F</u>  |
| Cdoylei    | : MSENDFFSNLILKLTHTLRS <u>W</u> C <u>F</u>  |
| Ccoli      | : MSENDFFSNLILKLTHTLRS <u>W</u> C <u>F</u>  |
| Clari      | : MERKKFSKLILEYSFNKAS <u>F</u> S <u>W</u> R |
| Cupsaliens | : --                                        |
| Cfetus     | : --                                        |
| Cconcicus  | : --                                        |
| Ccurvus    | : --                                        |
| Crectus    | : n/a                                       |
| Cshowae    | : --                                        |
| Cgracilis  | : --                                        |
| Chominis   | : n/a                                       |
| Sulfdeleyi | : --                                        |
| Arcbutzler | : --                                        |
| Wolsuccino | : --                                        |
| Hmustelae  | : --                                        |
| Hhepaticus | : --                                        |
| Hcinaedi   | : --                                        |
| Hpylori    | : --                                        |
| Hfelis     | : --                                        |
| Hbizzozero | : --                                        |
| Sulkujiens | : --                                        |
| Sudenitrif | : --                                        |
| Sulfurovum | : --                                        |
| Nitratirup | : --                                        |
| Nautprofun | : --                                        |

tgaTACATTaagtatTaattttaacaaAGGAGGaaaagATG  
 -10 +1 RBS LeuL

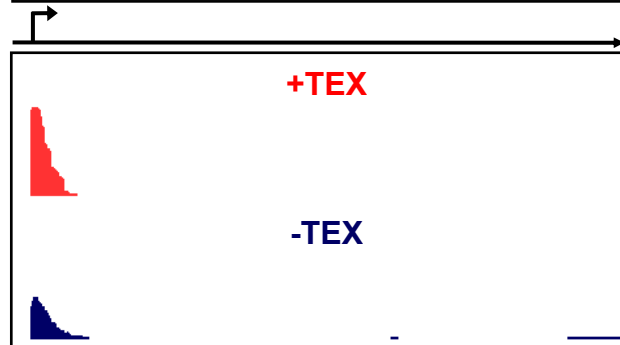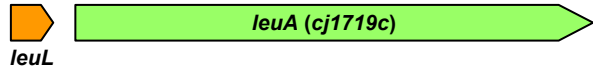

|            |                                                                                                                |
|------------|----------------------------------------------------------------------------------------------------------------|
| Cjejuni    | : MKQIFEISNSVQQKSKDNTFN <u>L</u> <u>L</u> <u>L</u> <u>Q</u> <u>L</u> <u>S</u> <u>L</u>                         |
| Cdoylei    | : MKQIFKISNSVQQKSKDNTFN <u>L</u> <u>L</u> <u>L</u> <u>Q</u> <u>L</u> <u>S</u> <u>L</u>                         |
| Ccoli      | : MTQV<X11>QKNKENHFN <u>L</u> <u>M</u> <u>L</u> <u>Q</u> <u>L</u> <u>S</u> <u>L</u> <u>I</u> <u>L</u> <u>N</u> |
| Clari      | : n/a                                                                                                          |
| Cupsaliens | : n/a                                                                                                          |
| Cfetus     | : MTPFSQKKYIFIYK <u>L</u> <u>S</u> <u>L</u> <u>L</u> <u>N</u> <u>L</u> <u>L</u>                                |
| Cconcicus  | : MSENGIISRKF <u>L</u> PKIEIKNS <u>L</u> <u>L</u> <u>L</u> <u>L</u> <u>L</u> <u>L</u> <u>R</u>                 |
| Ccurvus    | : MSDAGIISRKF <u>L</u> PKIEIKNS <u>L</u> <u>L</u> <u>L</u> <u>L</u> <u>L</u> <u>W</u>                          |
| Crectus    | : MNGNVKFN <u>A</u> <u>F</u> <u>F</u> <u>S</u> <u>L</u> <u>L</u> <u>L</u> <u>L</u> <u>L</u> <u>R</u>           |
| Cshowae    | : MNGNVKFN <u>A</u> <u>F</u> <u>F</u> <u>S</u> <u>L</u> <u>L</u> <u>L</u> <u>L</u> <u>L</u> <u>R</u>           |
| Cgracilis  | : --                                                                                                           |
| Chominis   | : --                                                                                                           |
| Sulfdeleyi | : MTC <u>L</u> SRFKISDQKKNNT <u>L</u> <u>L</u> <u>L</u> <u>L</u> <u>L</u> <u>L</u> <u>L</u> <u>N</u> <u>F</u>  |
| Arcbutzler | : MKIFDFYKSHFIKSVNS <u>L</u> <u>L</u> <u>L</u> <u>S</u> <u>F</u> <u>S</u> <u>L</u>                             |
| Wolsuccino | : MTSV<X11>NTFNKIE <u>L</u> <u>S</u> <u>L</u> <u>L</u> <u>P</u> <u>L</u> <u>L</u> <u>L</u> <u>S</u> <u>L</u>   |
| Hmustelae  | : MKNKFF <u>L</u> SFSVFY <u>L</u> SP <u>L</u> L <u>Q</u> <u>F</u>                                              |
| Hhepaticus | : LTIQSDT <u>L</u> RFSYN <u>L</u> KAFVFREF <u>L</u> <u>L</u> <u>L</u> <u>M</u>                                 |
| Hcinaedi   | : --                                                                                                           |
| Hpylori    | : n/a                                                                                                          |
| Hfelis     | : n/a                                                                                                          |
| Hbizzozero | : n/a                                                                                                          |
| Sulkujiens | : MKSHTMPISQPITDNRIVSFS <u>L</u> <u>L</u> <u>L</u> <u>L</u> <u>P</u> <u>L</u> <u>L</u>                         |
| Sudenitrif | : MIPFNMS <u>L</u> L <u>S</u> FIL <u>V</u> TK <u>P</u> L <u>F</u> <u>L</u>                                     |
| Sulfurovum | : MKTIRIHTTIFTKDCS <u>L</u> <u>L</u> <u>L</u> <u>L</u> <u>L</u> <u>A</u> <u>F</u>                              |
| Nitratirup | : VSETGVKAQKY <u>L</u> PKIEIKNH <u>L</u> <u>L</u> <u>H</u> <u>L</u> <u>L</u>                                   |
| Nautprofun | : --                                                                                                           |

agaTAGAATaatcAataatTTTTtagaaAGGAGaaaaATG  
 -10 +1 RBS MetL

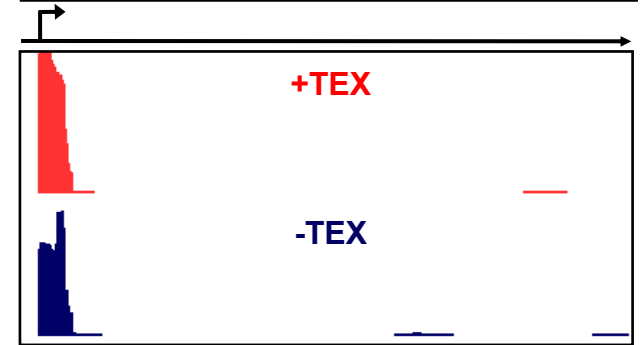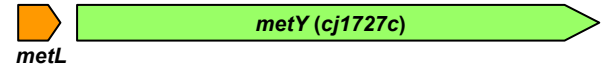

|            |                                          |
|------------|------------------------------------------|
| Cjejuni    | : MSYISFNL <u>M</u> LSSFC <u>M</u> RAWHA |
| Cdoylei    | : MSYTSFNF <u>M</u> LSSFC <u>M</u> RAWHA |
| Ccoli      | : MSYISFNL <u>M</u> LSSFC <u>M</u> RAWHA |
| Clari      | : n/a                                    |
| Cupsaliens | : n/a                                    |
| Cfetus     | : --                                     |
| Cconcicus  | : --                                     |
| Ccurvus    | : --                                     |
| Crectus    | : --                                     |
| Cshowae    | : --                                     |
| Cgracilis  | : --                                     |
| Chominis   | : --                                     |
| Sulfdeleyi | : --                                     |
| Arcbutzler | : --                                     |
| Wolsuccino | : --                                     |
| Hmustelae  | : n/a                                    |
| Hhepaticus | : --                                     |
| Hcinaedi   | : --                                     |
| Hpylori    | : --                                     |
| Hfelis     | : --                                     |
| Hbizzozero | : --                                     |
| Sulkujiens | : --                                     |
| Sudenitrif | : --                                     |
| Sulfurovum | : --                                     |
| Nitratirup | : --                                     |
| Nautprofun | : --                                     |
