# Supplementary material for: Parallel evolution of genome structure and transcriptional landscape in the Epsilonproteobacteria
Source: PubMed Central journal article supplement (PMC3847290; doi:10.1186/1471-2164-14-616), 2013-09-12
Supplement: 1471-2164-14-616-S13.pdf [file 1471-2164-14-616-S13.pdf]

**Table S6: Leaderless mRNAs of *C. jejuni* NCTC 11168**

| gene <sup>a</sup> | strand | TSS     | Start   | UTR length | RBS   | Leaderless | Sequence -30 to startcodon <sup>b</sup>                          |
|-------------------|--------|---------|---------|------------|-------|------------|------------------------------------------------------------------|
| <i>cj0153c</i>    | -      | 157298  | 157298  | 0          | no    | yes        | ttttaagtcaagattag <b>ggTAAAA</b> Tttttaat <u>ATG</u>             |
| <i>cj0164c</i>    | -      | 164091  | 164091  | 0          | no    | yes        | tcatagcaaaaaatattt <b>TAAAG</b> Tagaaaa <u>ATG</u>               |
| <i>cj0461c</i>    | -      | 426422  | 426422  | 0          | no    | yes        | taaaatataaattat <b>gcTATAG</b> Ttccgctt <u>ATG</u>               |
| <i>cj0595c</i>    | -      | 553151  | 553151  | 0          | no    | yes        | ggtttaaagctaattaac <b>TAAAA</b> Ttaaaaa <u>ATG</u>               |
| <i>cj0641</i>     | +      | 602326  | 602326  | 0          | no    | yes        | ttgctttgctaagattt <b>gaTATAA</b> Tttttt <u>ATG</u>               |
| <i>cj0667</i>     | +      | 622768  | 622768  | 0          | no    | yes        | aaattgatttttttt <b>gcTAAAA</b> Ttgctttt <u>ATG</u>               |
| <i>cj0846</i>     | +      | 793305  | 793305  | 0          | no    | yes        | tatttaattttactt <b>ggtTATAA</b> Tactttt <u>ATG</u>               |
| <i>cj1031</i>     | +      | 963479  | 963479  | 0          | no    | yes        | aatttatataaagtatat <b>TAAAA</b> Tatcaaa <u>ATG</u>               |
| <i>cj1152c</i>    | -      | 1085255 | 1085255 | 0          | no    | yes        | tttttaaaaaagctatat <b>TATAA</b> Tgttttt <u>ATG</u>               |
| <i>cj1247c</i>    | -      | 1176327 | 1176327 | 0          | no    | yes        | aattaagaaaagaaat <b>gcTAAAA</b> Tcatctt <u>ATG</u>               |
| <i>cj1257c</i>    | -      | 1188360 | 1188360 | 0          | no    | yes        | aaattataaaaaatata <b>TACA</b> Aatcc <u>ATG</u>                   |
| <i>cj1349c</i>    | -      | 1282299 | 1282299 | 0          | no    | yes        | aatcgccaaaaatattt <b>TATAA</b> Ttctttt <u>ATG</u>                |
| <i>cj1565c</i>    | -      | 1496400 | 1496400 | 0          | no    | yes        | atgttataagagtttt <b>gcTATAA</b> Ttatttt <u>ATG</u>               |
| <i>cj1620c</i>    | -      | 1548761 | 1548760 | 1          | no    | yes        | aattttaaaatttttt <b>gtTATA</b> CTctcatt <u>TATG</u>              |
| <i>cj1711c</i>    | -      | 1624461 | 1624459 | 2          | no    | yes        | taattaagaatttttag <b>gaTAAAA</b> Ttatttc <u>TtATG</u>            |
| <i>cj0430</i>     | +      | 391708  | 391711  | 3          | no    | yes        | atattttaagtttaattttg <b>TAAAA</b> Ttttc <u>AttATG</u>            |
| <i>cj1449c</i>    | -      | 1388187 | 1388184 | 3          | no    | yes        | tttttaaaaaatattttag <b>TATAA</b> Tttttac <u>AatATG</u>           |
| <i>cj1458c</i>    | -      | 1396196 | 1396193 | 3          | no    | yes        | aatttaaaaggaaatttta <b>TAAAA</b> Tcacgc <u>AttATG</u>            |
| <i>cj0792</i>     | +      | 742472  | 742477  | 5          | no    | yes        | tccttataaaaaattt <b>gcTAAAA</b> Ttatacta <u>TaaaaATG</u>         |
| <i>cj0748</i>     | +      | 703019  | 703027  | 8          | no    | yes        | ataatcagtaattttttta <b>TAGA</b> ATacctat <u>Gcgg</u> aataATG     |
| <i>cj1441c</i>    | -      | 1380906 | 1380897 | 9          | maybe | no         | ttttgaggatttttaatta <b>TAAAA</b> Taatgaa <u>AGG</u> taaaatATG    |
| <i>cj0318</i>     | +      | 288447  | 288457  | 10         | yes   | no         | aaaaatagttaaaatt <b>gcTAA</b> ACTaaggg <u>AtGAGA</u> attaATG     |
| <i>cj0945c</i>    | -      | 886130  | 886119  | 11         | yes   | no         | cttttagaaaaaata <b>gtTATAA</b> Ttaaagcc <u>AAGGA</u> aatataATG   |
| <i>cj1638</i>     | +      | 1562943 | 1562955 | 12         | yes   | no         | attatagccaaatctttg <b>TATAA</b> Ttttaac <u>AAGG</u> tttgtaaaATG  |
| <i>cj0829c</i>    | -      | 776786  | 776773  | 13         | yes   | no         | ttttttaatcattta <b>gaTAAAA</b> Taccaaa <u>AcaAAGG</u> ttaacaATG  |
| <i>cj1350</i>     | +      | 1282348 | 1282361 | 13         | yes   | no         | ttttggcgaattttgt <b>ggTAGA</b> ATtacatt <u>AaaaAGGA</u> aatttGTG |
| <i>cj1618c</i>    | -      | 1546343 | 1546330 | 13         | yes   | no         | aaatttcataaatttt <b>ggTAAAA</b> Tgtttac <u>TctAGGA</u> aatataATG |

a) Genes are sorted on length of the 5' UTR.

b) Capital letters indicate relevant motifs: promoters (bold, red typeface for the  $\sigma^{70}$  promoters with TAnaaT or gnTAnaaT motifs), TSS (green, underlined and bold typeface), putative ribosome binding site (blue, bold typeface) and translational startcodon.
